# Supplementary material
Source: PubMed Central journal article supplement (PMC4656857)
Supplement: mmc1.pdf [file mmc1.pdf]

# Supporting Information

## Vesicle leakage reflects target selectivity of antimicrobial lipopeptides from *Bacillus subtilis*

Sebastian Fiedler<sup>1\*</sup> and Heiko Heerklotz<sup>1,2,3\*</sup>

<sup>1</sup>Leslie Dan Faculty of Pharmacy, University of Toronto, Canada

<sup>2</sup>Department of Pharmaceutical Technology and Biopharmacy, University of Freiburg, Germany

<sup>3</sup>BIOSS Centre for Biological Signalling Studies, Freiburg, Germany

\*Corresponding authors: [sebastian.fiedler@utoronto.ca](mailto:sebastian.fiedler@utoronto.ca), [heiko.heerklotz@utoronto.ca](mailto:heiko.heerklotz@utoronto.ca)

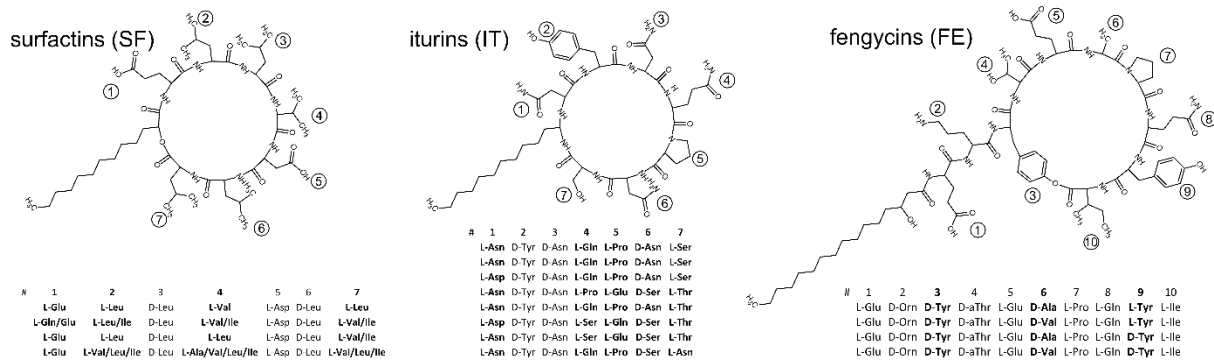

Figure S11. Structures of *B. subtilis* lipopeptides including their most common variants. For more details refer to: Ongena, M., and P. Jacques. 2008. Trends Microbiol. 16:115-125.

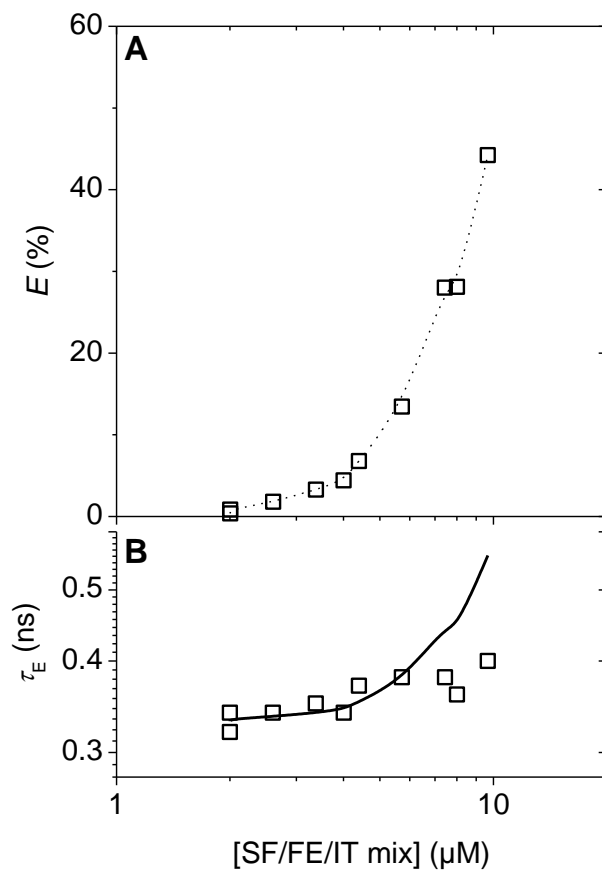

Figure S12. SF/IT/FE mix-induced leakage of 30  $\mu\text{M}$  POPC vesicles. (A) Dye efflux after 1 h,  $E$ , as a function of SF/IT/FE mix concentration. Dotted lines guide the eye. (B) Lifetime of entrapped dye,  $\tau_E$ , as a function of SF/IT/FE mix concentration. Solid lines simulate  $\tau_E$  for ideal homogeneously graded leakage (Eqs. 3 and 4 of the main text).

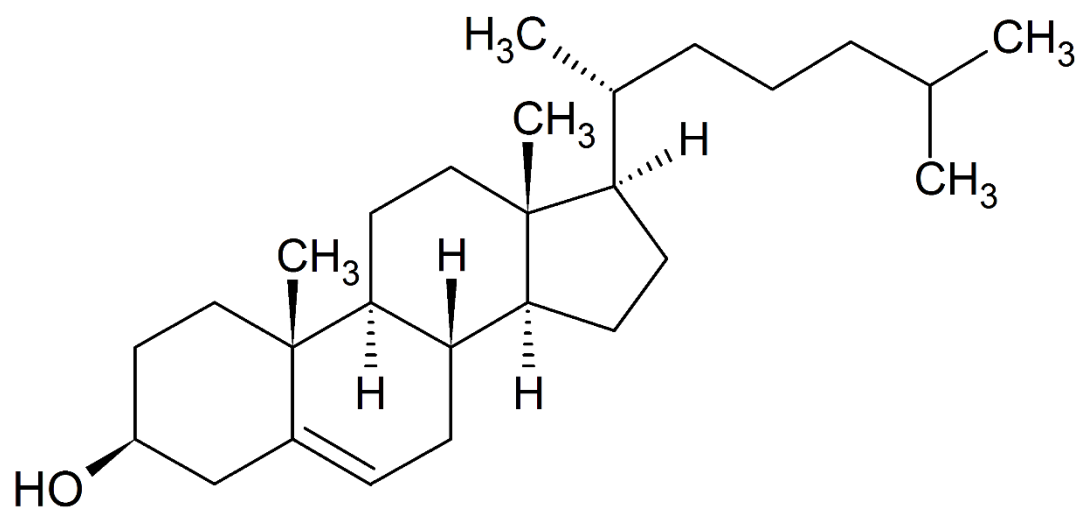

Figure SI3. Structural formula of Cholesterol.

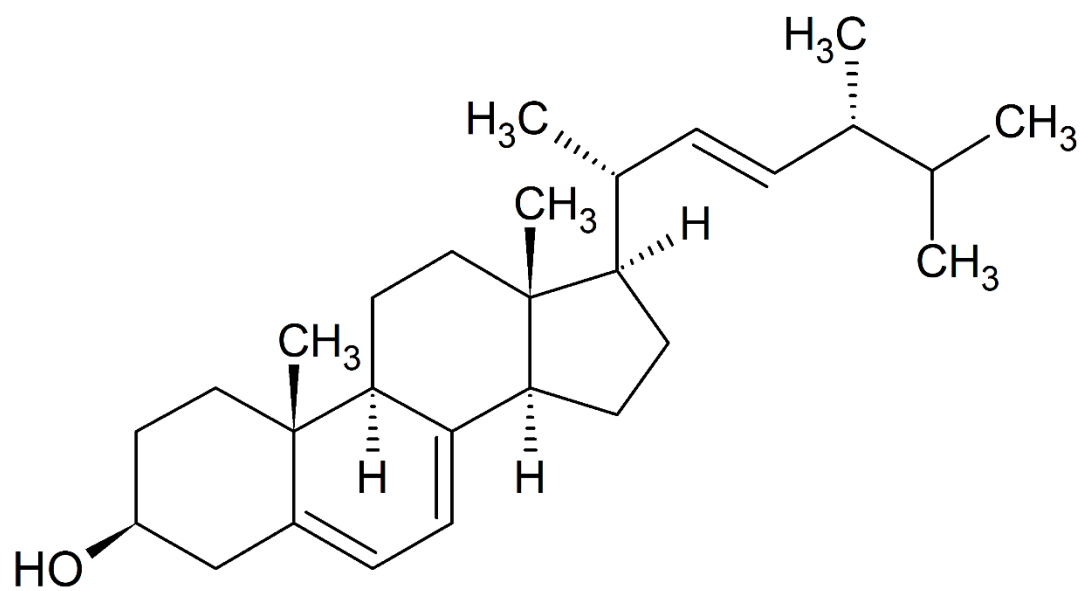

Figure SI4. Structural formula of Ergosterol.

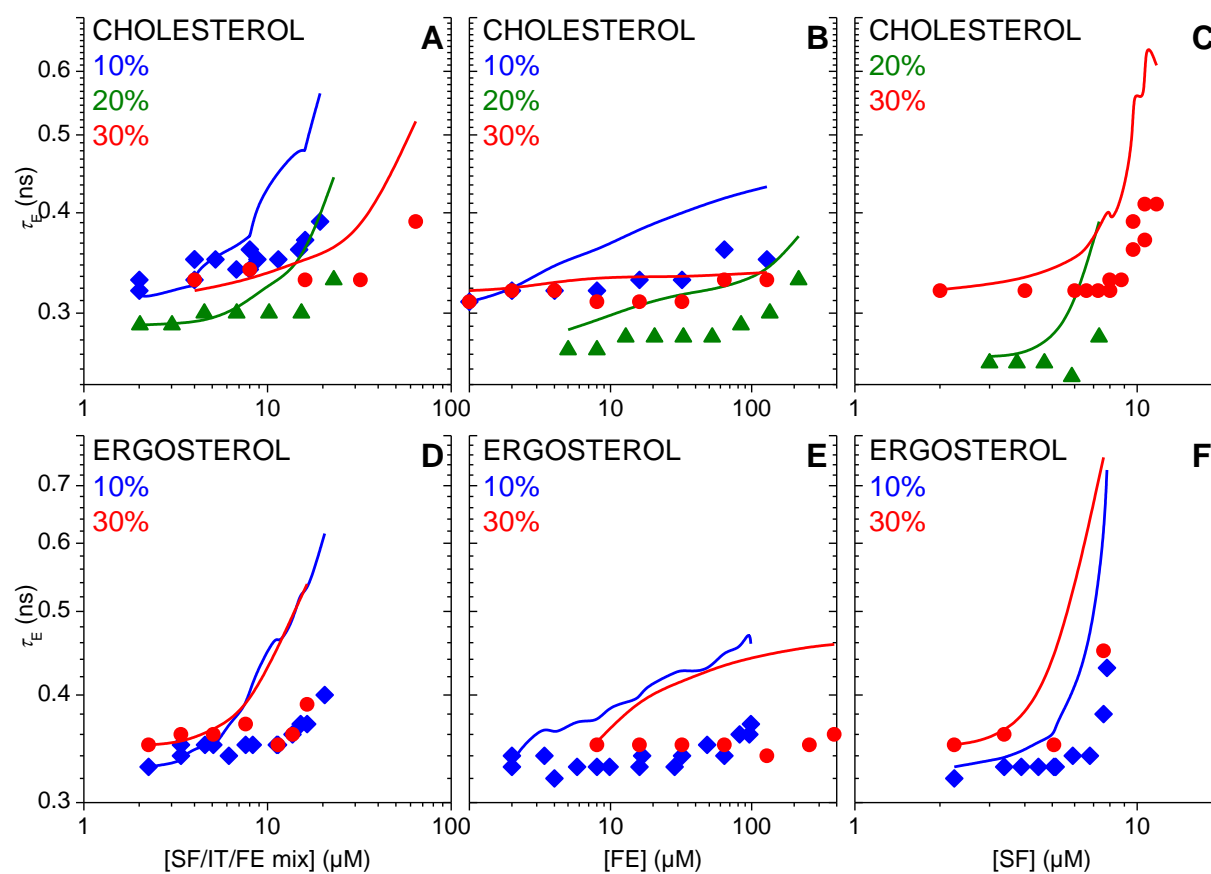

Figure S15. Lifetime of entrapped dye,  $\tau_E$ , as a function of lipopeptide concentration as obtained by leakage of 30  $\mu\text{M}$  POPC vesicles containing cholesterol (A–C) or ergosterol (D–E) induced by surfactins (SF)/iturins (IT)/fengycins (FE) natural mixture (A/D), FE (B/E), and SF (C/F), respectively. Lines indicate simulated values of  $\tau_E$  for ideal homogeneously graded leakage mechanisms (Eqs. 3 and 4 of the main text). Squares, diamonds, triangles, and circles represent pure POPC, 10% sterol, 20% sterol, and 30% sterol, respectively.
